# Supplementary material for: Effects of stratified medication review in high-risk patients at admission to hospital: a randomised controlled trial
Source: PubMed Central journal article supplement — Ther Adv Drug Saf. 2020 Sep 20;11:2042098620957142. doi: 10.1177/2042098620957142 (PMC7509721; doi:10.1177/2042098620957142), 2020-09-20
Supplement: supplementary_material.pdf [file supplementary_material.pdf]

**Table 1. MERIS' categorisation of patients to low- and high risk group  
Results from patients in the control group**

|                                                                            | <b>Low risk<br/>(N=122)</b> | <b>High risk<br/>(N=60)</b> | <b>P-value</b> |
|----------------------------------------------------------------------------|-----------------------------|-----------------------------|----------------|
| <b>Prescribing errors,<br/>mean per patient (95%<br/>CI)</b>               | 0.66 (0.49-0.84)            | 1.2 (0.82-1.58)             | 0.004          |
| <b>Patients with<br/>prescribing errors<br/>N ( %)</b>                     | 53 (43.4)                   | 40 (66.6)                   | 0.003          |
| <b>Age, years, mean<br/>(95%CI)</b>                                        | 70.2 (66.9-73.5)            | 78.2 (74.9-81.5)            | 0.003          |
| <b>Length of hospital stay,<br/>days, mean (95% CI)</b>                    | 4.1 (3.2-4.9)               | 5.1 (3.6-6.2)               | 0.2            |
| <b>Length of stay at the<br/>Acute Admissions Unit,<br/>hours (95% CI)</b> | 24.5 (21.8-27.1)            | 24.9 (21.2-29.0)            | 0.8            |
| <b>Discharged directly<br/>from the Acute<br/>Admissions Unit, n (%)</b>   | 67 (54.9)                   | 30 (50.0)                   | 0.5            |
| <b>Comorbidity</b>                                                         |                             |                             |                |
| - Respiratory                                                              | 24 (19.7)                   | 20 (33.3)                   | 0.06           |
| - Endocrine                                                                | 28 (23.0)                   | 22 (36.6)                   | 0.07           |
| - Cardiovascular                                                           | 54 (44.3)                   | 43 (71.6)                   | 0.001          |
| - Musculoskeletal                                                          | 21 (17.2)                   | 11 (18.3)                   | 0.84           |
| - Cancer                                                                   | 15 (12.3)                   | 8 (13.3)                    | 0.82           |
| - Mental and<br>behavioural disorders                                      | 22 (18.0)                   | 11 (18.3)                   | 1.0            |
| <b>Number of<br/>comorbidities</b>                                         |                             |                             |                |
| - 0                                                                        | 18 (14.8)                   | 2 (3.3)                     | 0.02           |
| - 1                                                                        | 57 (46.7)                   | 19 (31.7)                   | 0.05           |
| - 2                                                                        | 35 (28.7)                   | 26 (43.3)                   | 0.06           |
| - ≥3                                                                       | 12 (9.8)                    | 13 (21.7)                   | 0.04           |
| <b>Contacts to general<br/>practitioners, mean<br/>(95% CI)</b>            | 9.5 (7.6-11.3)              | 12.2 (9.8-14.5)             | 0.01           |
| <b>Mortality, n (%) (95%<br/>CI)</b>                                       | 23 (18.9)                   | 12 (20.0)                   | 0.85           |
